# Supplementary material
Source: publisher figshare collection journal article supplement (https://acs.figshare.com/ndownloader/files/9751213)
Supplement: Supplementary file 1 [file 9751213]

Supporting Information for

## **Nanocomposite Phosphor Consisting of $\text{CaI}_2\text{:Eu}^{2+}$ Single Nanocrystals Embedded in Crystalline $\text{SiO}_2$**

Hisayoshi Daicho, \*<sup>†</sup> Takeshi Iwasaki,<sup>†</sup> Yu Shinomiya,<sup>†</sup> Akitoshi Nakano,<sup>§</sup>

Hiroshi Sawa,<sup>§</sup> Wataru Yamada,<sup>§</sup> Satoru Matsuishi<sup>⊥</sup> and Hideo Hosono<sup>⊥</sup>

<sup>†</sup> Research & Development Department, Koito Manufacturing Co., 500, Kitawaki, Shimizu-ku,  
Shizuoka 424-8764, Japan

<sup>§</sup> Department of Applied Physics, Nagoya University, Furo-cho, Chikusa-ku, Nagoya 464-8603,  
Japan

<sup>⊥</sup> Materials Research Center for Element Strategy, Tokyo Institute of Technology, 4259-S2-13,  
Nagatsuta-cho, Midori-ku, Yokohama 226-8503, Japan

Corresponding author;

E-mail: cl\_ms@koito.co.jp

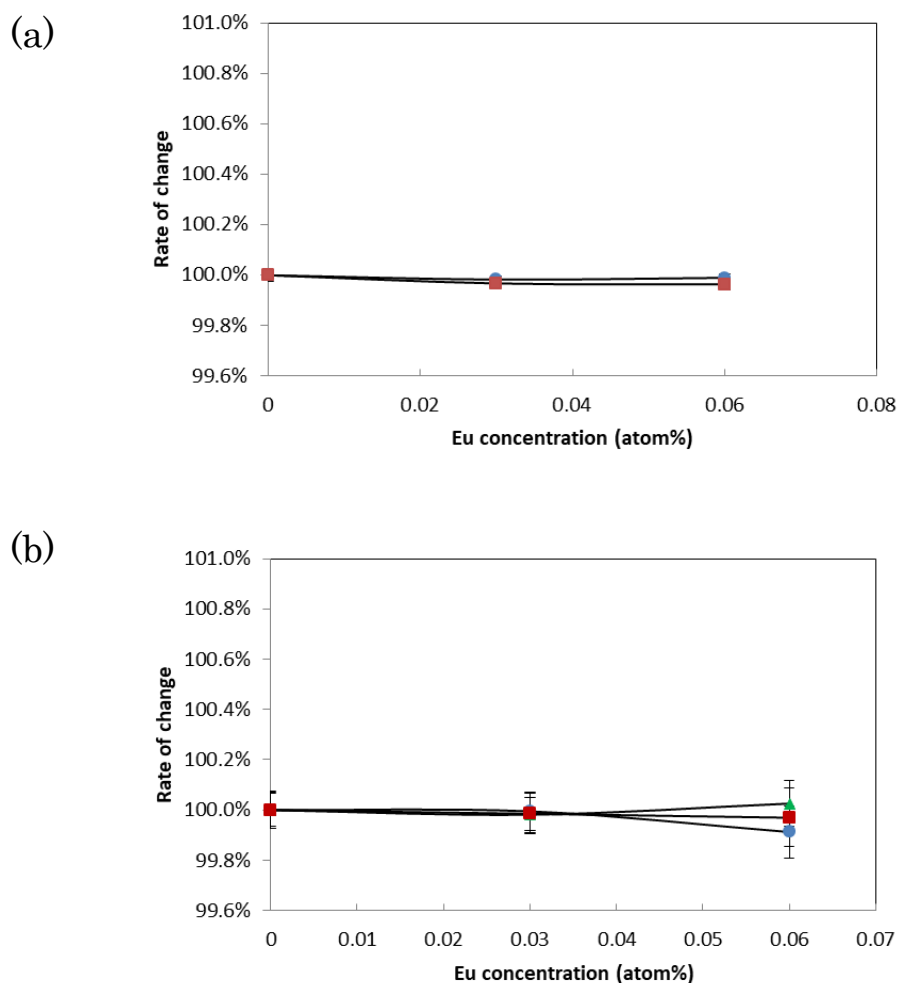

**Figure S1.** (a) Normalized lattice parameters against  $\alpha$ -cristobalite in  $(\text{CaI}_2:\text{Eu}^{2+}/\text{SiO}_2)$  ( $\text{Eu}=0$ ) along the a-axis (blue circles) and c-axis (red squares) of  $\alpha$ -cristobalite as a function of Eu content. (b) Normalized lattice parameters against  $\alpha$ - $\text{CaSiO}_3$  in  $(\text{CaI}_2:\text{Eu}^{2+}/\text{SiO}_2)$  ( $\text{Eu}=0$ ) along the a-axis (blue circles), b-axis (green triangles), and c-axis (red squares) of  $\alpha$ - $\text{CaSiO}_3$  as a function of Eu content. Eu atom% in  $(\text{CaI}_2:\text{Eu}^{2+}/\text{SiO}_2)$  were determined with inductively coupled plasma atomic emission spectroscopy.

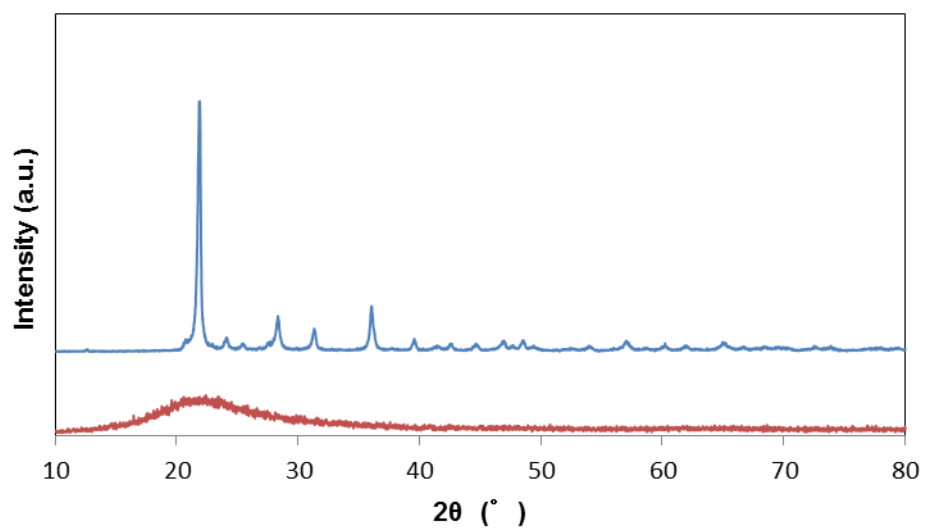

**Figure S2.** XRD patterns of  $(\text{CaI}_2:\text{Eu}^{2+}/\text{SiO}_2)$  at sintering temperature of 1273 K (blue curve) and 1073 K (red curve).

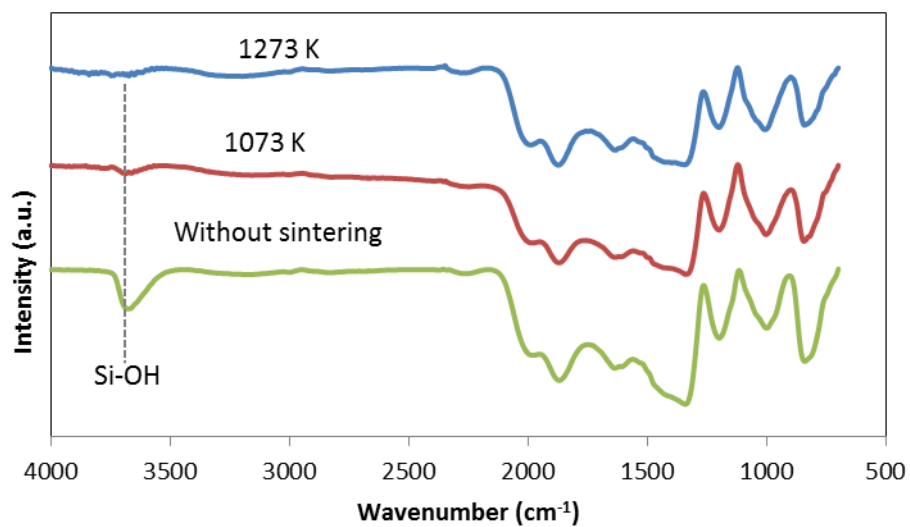

**Figure S3.** Fourier transform IR spectra of unsintered SiO<sub>2</sub> (green curve) and SiO<sub>2</sub> sintered at 1273 K (blue curve) and 1073 K (red curve) in a reducing atmosphere.

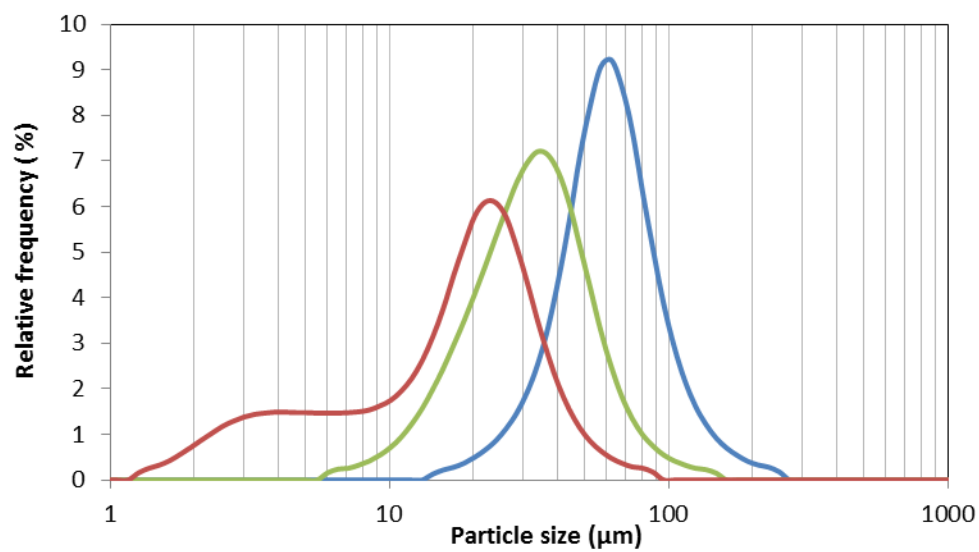

**Figure S4.** Particle size distribution curves of the SiO<sub>2</sub> raw material (green), the milled raw materials before sintering (red), and (CaI<sub>2</sub>:Eu<sup>2+</sup>/SiO<sub>2</sub>) (blue).

(a)

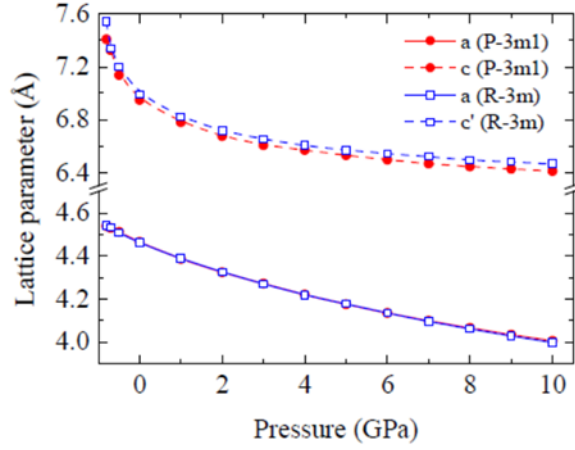

(b)

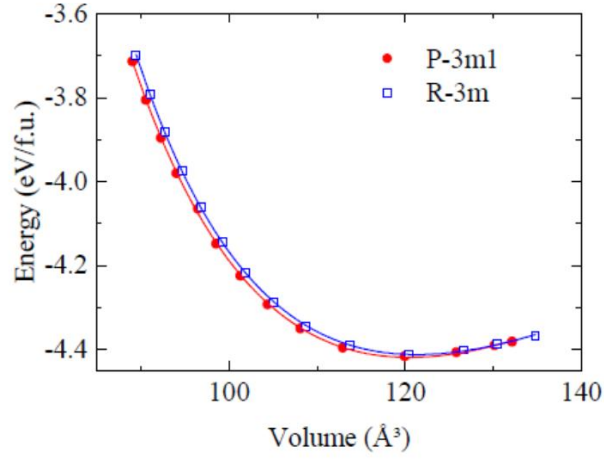

**Figure S5.** (a) Plots of lattice parameters as a function of external pressure: lattice parameter along the  $a$ -axis of  $6H\text{-CaI}_2$  (space group  $R3m$ ),  $1/3$  of the lattice parameter along the  $c$ -axis of  $6H\text{-CaI}_2$  ( $R3m$ ), lattice parameter along the  $a$ -axis of  $2H\text{-CaI}_2$  (space group  $P3m1$ ), and lattice parameter along the  $c$ -axis of  $2H\text{-CaI}_2$  ( $P3m1$ ). (b) Plots of total electron energy as a function of cell volume:  $6H\text{-CaI}_2$  ( $R3m$ ) and  $2H\text{-CaI}_2$  ( $P3m1$ ), respectively.

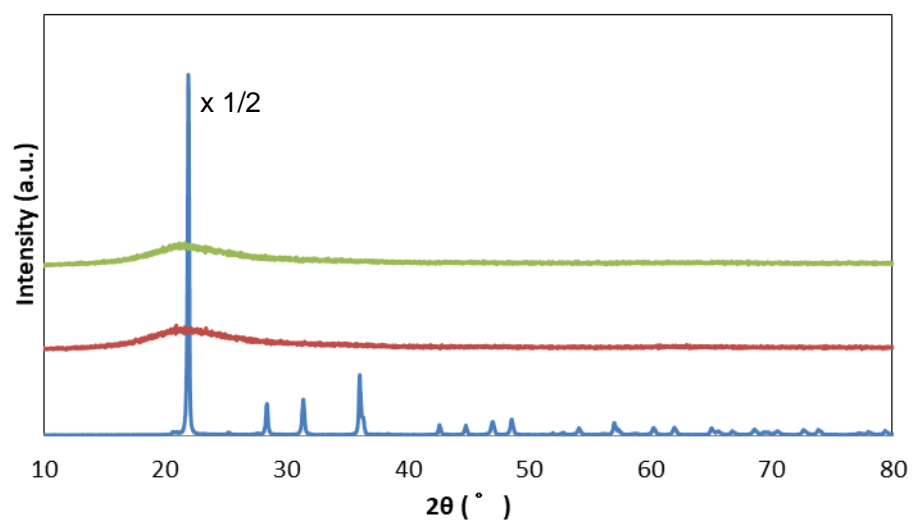

**Figure S6.** XRD patterns of  $\text{SiO}_2$  powder sintered at 1273 K (green curve), 1473 K (red curve), and 1623 K (blue curve).

**Table S1.** Composition (atom %) of  $(\text{CaI}_2\text{:Eu}^{2+}/\text{SiO}_2)$  and  $\text{BaMaAl}_{10}\text{O}_{17}\text{:Eu}^{2+}$  measured by inductively coupled plasma atomic emission spectroscopy combined with ion chromatography.

|                                                  | Eu   | Ca  | Si   | I   | Ba  | Mg  | Al   |
|--------------------------------------------------|------|-----|------|-----|-----|-----|------|
| $(\text{CaI}_2\text{:Eu}^{2+}/\text{SiO}_2)$     | 0.1  | 0.6 | 32.4 | 0.4 | —   | —   | —    |
| $\text{BaMaAl}_{10}\text{O}_{17}\text{:Eu}^{2+}$ | 0.65 | —   | —    | —   | 2.7 | 3.4 | 33.0 |



**Table S2.** Composition (atom %) of each region of the (CaI<sub>2</sub>:Eu<sup>2+</sup>/SiO<sub>2</sub>) phosphor as measured by scanning electron microscopy combined with energy dispersive X-ray spectrometry.

|                                       | <b>Eu</b> | <b>Si</b> | <b>Ca</b> | <b>O</b> | <b>I</b> |
|---------------------------------------|-----------|-----------|-----------|----------|----------|
| <b>Nucleus at the particle center</b> | 0         | 33.2      | 0         | 66.5     | 0.3      |
| <b>Outer layer matrix</b>             | 0         | 33.0      | 0.2       | 66.1     | 0.7      |
| <b>White spot in the outer layer</b>  | 0.6       | 32.1      | 1.0       | 64.1     | 3.2      |

**Table S3.** Crystallographic data for  $6H\text{-CaI}_2\text{:Eu}^{2+}$  in  $(\text{CaI}_2\text{:Eu}^{2+}/\text{SiO}_2)$  by Rietveld refinement, along with literature data for  $2H\text{-CaI}_2$ .

|                                                           | $6H\text{-CaI}_2\text{:Eu}^{2+}$ |             |             | $2H\text{-CaI}_2$ |
|-----------------------------------------------------------|----------------------------------|-------------|-------------|-------------------|
| Eu atom % in $(\text{CaI}_2\text{:Eu}^{2+}/\text{SiO}_2)$ | 0                                | 0.03        | 0.06        | —                 |
| Space group                                               | $R\bar{3}m$                      | $R\bar{3}m$ | $R\bar{3}m$ | $P\bar{3}m1$      |
| Lattice parameter                                         |                                  |             |             |                   |
| $a$                                                       | 4.510(2)                         | 4.530(1)    | 4.548(1)    | 4.49(2)           |
| $c$                                                       | 20.998(27)                       | 21.002(12)  | 21.006(15)  | 6.975(30)         |

Eu atom% in  $(\text{CaI}_2\text{:Eu}^{2+}/\text{SiO}_2)$  were determined with inductively coupled plasma atomic emission spectroscopy.
